# Supplementary material
Source: PubMed Central journal article supplement (PMC4874239)
Supplement: supp_JCO.2009.27.4324_SupplementaryFigure-2-New-PAM84-Class-flat.pdf [file supp_JCO.2009.27.4324_SupplementaryFigure-2-New-PAM84-Class-flat.pdf]

**A**

| Training Confusion Matrix (Threshold=9.30823) |     |     |         |         |                  |
|-----------------------------------------------|-----|-----|---------|---------|------------------|
| True/Predicted                                | WNT | SHH | Group C | Group D | Class Error Rate |
| WNT                                           | 8   | 0   | 0       | 0       | 0.000            |
| SHH                                           | 0   | 33  | 0       | 0       | 0.000            |
| Group C                                       | 0   | 0   | 25      | 2       | 0.074            |
| Group D                                       | 0   | 0   | 0       | 35      | 0.000            |

**B**

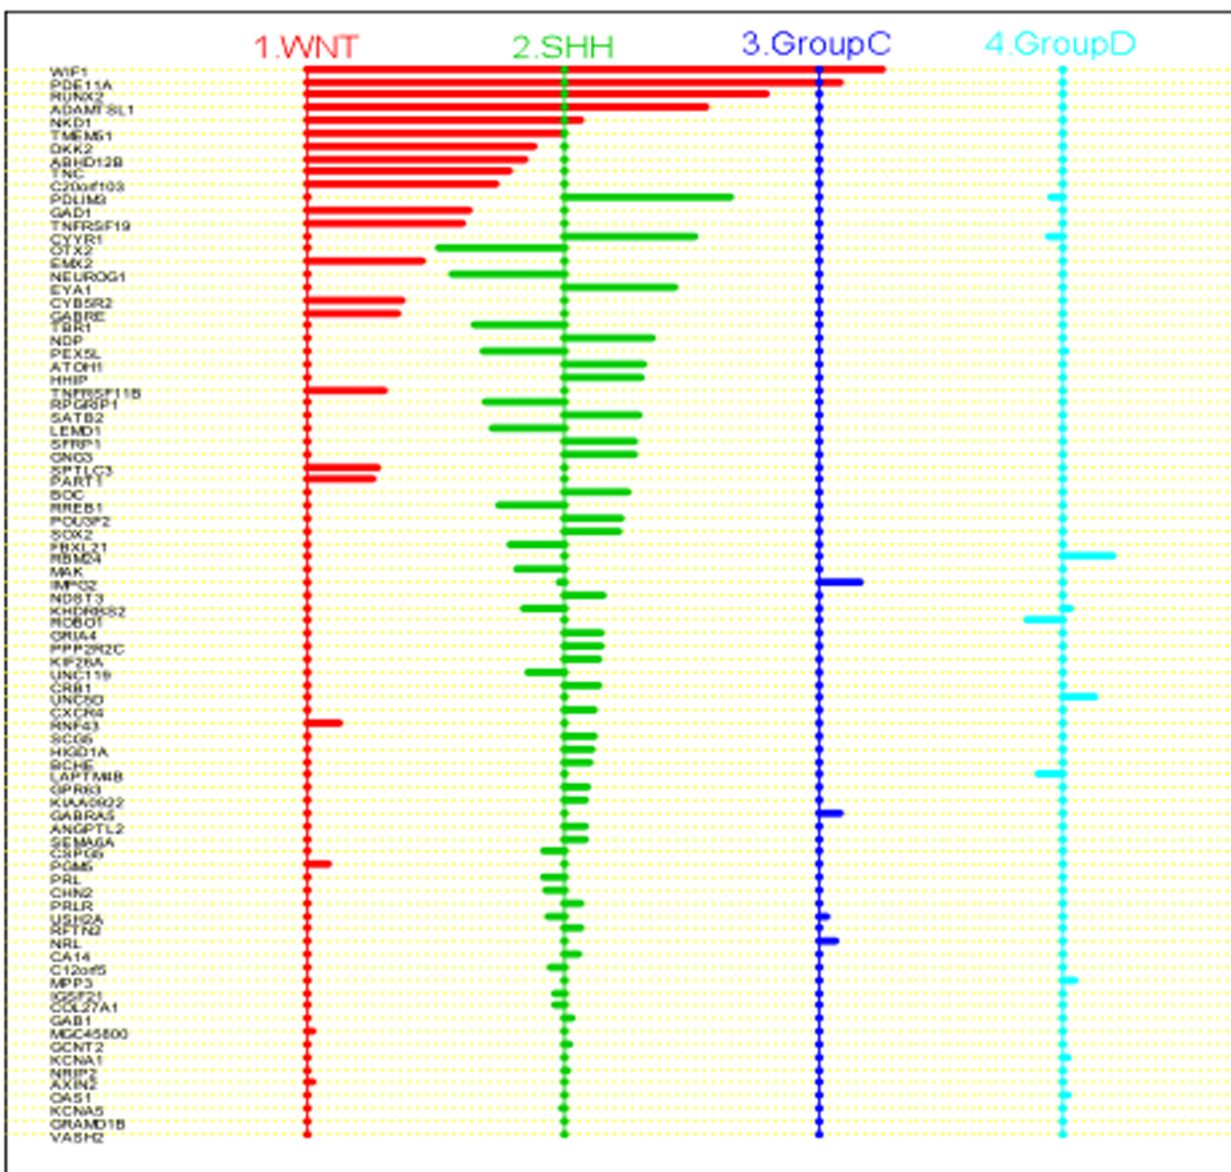

**C**

|                  | WNT | SHH | Group C | Group D |
|------------------|-----|-----|---------|---------|
| Kool62-"A" (WNT) | 9   | 0   | 0       | 0       |
| Kool62-"B" (SHH) | 0   | 15  | 0       | 0       |
| Kool62-"C"       | 0   | 0   | 0       | 16      |
| Kool62-"D"       | 0   | 0   | 0       | 11      |
| Kool62-"E"       | 0   | 0   | 9       | 2       |
