# Supplementary material
Source: PubMed Central journal article supplement (PMC4874239)
Supplement: supp_JCO.2009.27.4324_SupplementaryTable5a-CGP-WNT-Formatted.pdf [file supp_JCO.2009.27.4324_SupplementaryTable5a-CGP-WNT-Formatted.pdf]

Northcott et al. Supplementary Table 5a

| GSEA: Chemical & Genetic Perturbations --- Enriched in WNT vs Non-WNT |                             |                                                                                                                                                                                                                                                             |              |              |              |
|-----------------------------------------------------------------------|-----------------------------|-------------------------------------------------------------------------------------------------------------------------------------------------------------------------------------------------------------------------------------------------------------|--------------|--------------|--------------|
| #                                                                     | Gene Set Name               | Description                                                                                                                                                                                                                                                 | NES          | pVal         | FDR qValue   |
| 1                                                                     | <b>SANSOM_APC_4_DN</b>      | <b>The top 98 downregulated genes following Apc loss at day 4</b>                                                                                                                                                                                           | <b>1.912</b> | <b>0.000</b> | <b>0.074</b> |
| 2                                                                     | YE_INTRAMETASTATIC_HCC_UP   | Genes highly expressed in hepatocellular carcinoma with intra-hepatic metastasis.                                                                                                                                                                           | 1.851        | 0.000        | 0.109        |
| 3                                                                     | TARTE_PC                    | Genes overexpressed in polyclonal plasmablastic cells (PPCs), mature plasma cells isolated from tonsils (TPCs), and mature plasma cells isolated from bone marrow (BMPCs), as compared to B cells purified from peripheral blood (PBBs) and tonsils (TBCs). | 1.849        | 0.000        | 0.075        |
| 4                                                                     | BRCA2_BRCA1_UP              | Genes up-regulated in BRCA2-linked breast tumors, relative to BRCA1-linked tumors                                                                                                                                                                           | 1.826        | 0.000        | 0.088        |
| 5                                                                     | KLEIN_PEL_UP                | Genes downregulated in AIDS-related primary effusion lymphoma (PEL) cells compared to normal B cells and other tumor subtypes.                                                                                                                              | 1.826        | 0.000        | 0.070        |
| 6                                                                     | <b>TGFBETA_LATE_UP</b>      | <b>Upregulated by TGF-beta treatment of skin fibroblasts only at 1-4 hrs (clusters 4-6)</b>                                                                                                                                                                 | <b>1.826</b> | <b>0.000</b> | <b>0.059</b> |
| 7                                                                     | XU_CBP_DN                   | Fifty-nine probe sets downregulated at least 17-fold in CBP null B cells                                                                                                                                                                                    | 1.815        | 0.000        | 0.062        |
| 8                                                                     | ADIP_DIFF_CLUSTER3          | Strongly upregulated at 8 hours during differentiation of 3T3-L1 fibroblasts into adipocytes (cluster 3)                                                                                                                                                    | 1.780        | 0.002        | 0.094        |
| 9                                                                     | AGED_MOUSE_NEOCORTEX_UP     | Upregulated in the neocortex of aged adult mice (30-month) vs. young adult (5-month)                                                                                                                                                                        | 1.770        | 0.000        | 0.095        |
| 10                                                                    | IFN_BETA_GLIOMA_DN          | Down-regulated in human glioma cells (T98) at 48 hours following treatment with interferon-beta                                                                                                                                                             | 1.768        | 0.000        | 0.090        |
| 11                                                                    | CHEN_HOXA5_TARGETS_DN       | The following tables are gene lists which included differentially expressed genes with at least two-fold changes (Sig log-average >1) in 4 out of 4 comparisons as described in the text Down-regulated                                                     | 1.729        | 0.002        | 0.145        |
| 12                                                                    | UVC_TTD_4HR_UP              | Up-regulated at 4 hours following treatment of XPB/TTD fibroblasts with 3 J/m <sup>2</sup> UVC                                                                                                                                                              | 1.727        | 0.022        | 0.137        |
| 13                                                                    | IL6_SCAR_FIBRO_UP           | Upregulated following IL-6 treatment in hypertrophic scar fibroblasts                                                                                                                                                                                       | 1.725        | 0.004        | 0.129        |
| 14                                                                    | <b>TGFBETA_C5_UP</b>        | <b>Upregulated by TGF-beta treatment of skin fibroblasts, cluster 5</b>                                                                                                                                                                                     | <b>1.715</b> | <b>0.000</b> | <b>0.138</b> |
| 15                                                                    | ADIPOGENESIS_HMSC_CLASS8_DN | Down-regulated 1-14 days following the differentiation of human bone marrow mesenchymal stem cells (hMSC) into adipocytes, versus untreated hMSC cells (Class VIII)                                                                                         | 1.692        | 0.002        | 0.174        |
| 16                                                                    | UVC_HIGH_ALL_UP             | Up-regulated at any timepoint following treatment of WS1 human skin fibroblasts with UVC at a high dose (50 J/m <sup>2</sup> ) (clusters b1-b4)                                                                                                             | 1.687        | 0.008        | 0.175        |
| 17                                                                    | AS3_FIBRO_C1                | Upregulated strongly by sodium arsenite in fibroblasts (Cluster 1)                                                                                                                                                                                          | 1.678        | 0.002        | 0.186        |
| 18                                                                    | AS3_FIBRO_C2                | Upregulated moderately by sodium arsenite in fibroblasts (Cluster 2)                                                                                                                                                                                        | 1.678        | 0.002        | 0.175        |
| 19                                                                    | OXSTRESS_RPE_H2O2TBH_DN     | Downregulated by H2O2 and t-BH in retinal pigment epithelium cells (Tables 5)                                                                                                                                                                               | 1.678        | 0.002        | 0.166        |
| 20                                                                    | AGED_MOUSE_MUSCLE_UP        | Upregulated in the gastrocnemius muscle of aged adult mice (30-month) vs. young adult (5-month)                                                                                                                                                             | 1.675        | 0.006        | 0.164        |
