# Supplementary material
Source: PubMed Central journal article supplement (PMC4874239)
Supplement: supp_JCO.2009.27.4324_SupplementaryTable5b-CGP-SHH-Formatted.pdf [file supp_JCO.2009.27.4324_SupplementaryTable5b-CGP-SHH-Formatted.pdf]

Northcott et al. Supplementary Table 5b

| GSEA: Chemical & Genetic Perturbations --- Enriched in SHH vs Non-SHH |                                             |                                                                                                                                                                                                                                            |              |              |              |
|-----------------------------------------------------------------------|---------------------------------------------|--------------------------------------------------------------------------------------------------------------------------------------------------------------------------------------------------------------------------------------------|--------------|--------------|--------------|
| #                                                                     | Gene Set Name                               | Description                                                                                                                                                                                                                                | NES          | pVal         | FDR qValue   |
| 1                                                                     | MYOD_BRG1_UP                                | Genes up-regulated following transduction of MyoD in NIH 3T3 cells that fail to achieve full induction with expression of a dominant-negative BRG1 allele; induction thought to require functional BRG1                                    | 1.845        | 0.002        | 0.127        |
| 2                                                                     | HUMAN_TISSUE_LIVER                          | Genes expressed specifically in human liver tissue                                                                                                                                                                                         | 1.718        | 0.014        | 0.635        |
| 3                                                                     | LEE_TCELLS6_UP                              | Transcripts enriched more than 3-fold in DP compared to other lymphocytes, with average signal value differences of at least 100 between DP and every other lymphocyte subpopulation                                                       | 1.704        | 0.000        | 0.522        |
| 4                                                                     | BCNU_GLIOMA_NOMGMT_48HRS_UP                 | Up-regulated in an MGMT-deficient glioma cell line (A172) at 48 hours following treatment with BCNU                                                                                                                                        | 1.702        | 0.010        | 0.402        |
| 5                                                                     | MUNSHI_MM_UP                                | Genes upregulated in multiple myeloma (MM) cells versus the normal plasma cells of patients' identical twins.                                                                                                                              | 1.694        | 0.008        | 0.357        |
| 6                                                                     | MUNSHI_MM_VS_PCS_UP                         | Selected up-regulated genes in patient MM cells versus normal twin PCs                                                                                                                                                                     | 1.651        | 0.008        | 0.546        |
| 7                                                                     | AGUIRRE_PANCREAS_CHR19                      | Genes on chromosome 19 with copy-number-driven expression in pancreatic adenocarcinoma.                                                                                                                                                    | 1.644        | 0.057        | 0.513        |
| 8                                                                     | ZUCCHI_EPITHELIAL_DN                        | The 50 most downregulated genes in primary invasive breast ductal carcinoma or metastatic breast carcinoma isolated from lymph nodes, as compared to normal mammary epithelium.                                                            | 1.619        | 0.012        | 0.622        |
| 9                                                                     | HADDAD_CD45CD7_PLUS_VS_MINUS_UP             | Genes enriched in CD45RA <sup>hi</sup> CD7 <sup>hi</sup> vs CD45RA <sup>int</sup> CD7 <sup>-</sup> HPCs                                                                                                                                    | 1.615        | 0.010        | 0.584        |
| 10                                                                    | HADDAD_HSC_CD7_UP                           | Genes upregulated in human hematopoietic stem cells of the line CD45RA <sup>(hi)</sup> CD7 <sup>+</sup> , which are biased toward developing into T lymphocytes or natural killer cells, versus CD45RA <sup>(int)</sup> CD7 <sup>-</sup> . | 1.615        | 0.010        | 0.526        |
| 11                                                                    | TSA_CD4_DN                                  | Down-regulated in mouse CD4 <sup>+</sup> T-cells following 4 hour treatment with 100 nM trichostatin A                                                                                                                                     | 1.604        | 0.023        | 0.547        |
| 12                                                                    | GENOTOXINS_ALL_24HRS_REG                    | Genes most consistently regulated in mouse lymphocytes (TK 3.7.2C) at 24 hours by all six genotoxins tested (cisplatin, methyl methanesulfonate, mitomycin C, taxol, hydroxyurea and etoposide)                                            | 1.604        | 0.014        | 0.503        |
| 13                                                                    | UVB_NHEK3_C3                                | Regulated by UV-B light in normal human epidermal keratinocytes, cluster 3                                                                                                                                                                 | 1.594        | 0.006        | 0.522        |
| 14                                                                    | GAMMA-UV_FIBRO_DN                           | Down-regulated at any timepoint by treatment of human fibroblasts with UV light or gamma radiation, but not by 4-NQO                                                                                                                       | 1.575        | 0.013        | 0.609        |
| 15                                                                    | CMV_HCMV_TIMECOURSE_4HRS_DN                 | Down-regulated in fibroblasts following infection with human cytomegalovirus (at least 3-fold, with Affymetrix change call, in at least two consecutive timepoints), with maximum change at 4 hours                                        | 1.571        | 0.007        | 0.593        |
| 16                                                                    | CHIARETTI_ZAP70_DIFF                        | Differentially expressed genes between high versus low ZAP70 cases with no known molecular aberrations                                                                                                                                     | 1.566        | 0.014        | 0.592        |
| 17                                                                    | <b>POMEROY_DESMOPLASIC_VS_CLASSIC_MD_UP</b> | <b>Genes expressed in desmoplastic medulloblastomas. (p &lt; 0.01)</b>                                                                                                                                                                     | <b>1.566</b> | <b>0.000</b> | <b>0.558</b> |
| 18                                                                    | WANG_MLL_CBP_VS_GMP_UP                      | MLL-CBP alters the genetic programs of GMP The top 50 genes most closely associated with MLL-CBP expression UP-regulated                                                                                                                   | 1.559        | 0.014        | 0.576        |
| 19                                                                    | IFN_ALL_UP                                  | Upregulated 2-fold in HT1080 cells 6 hours following treatment with interferons alpha, beta and gamma                                                                                                                                      | 1.548        | 0.022        | 0.614        |
| 20                                                                    | UVB_NHEK2_UP                                | Upregulated by UV-B light in normal human epidermal keratinocytes                                                                                                                                                                          | 1.540        | 0.051        | 0.638        |
