# Supplementary material
Source: PubMed Central journal article supplement (PMC4874239)
Supplement: supp_JCO.2009.27.4324_SupplementaryTable5c-CGP-GroupC-CGP-Table-Formatted.pdf [file supp_JCO.2009.27.4324_SupplementaryTable5c-CGP-GroupC-CGP-Table-Formatted.pdf]

Northcott et al. Supplementary Table 5c

| GSEA: Chemical & Genetic Perturbations --- Enriched in Group C vs Non-Group C |                                      |                                                                                                                                                                                                                                                            |       |       |            |
|-------------------------------------------------------------------------------|--------------------------------------|------------------------------------------------------------------------------------------------------------------------------------------------------------------------------------------------------------------------------------------------------------|-------|-------|------------|
| #                                                                             | Gene Set Name                        | Description                                                                                                                                                                                                                                                | NES   | pVal  | FDR qValue |
| 1                                                                             | POMEROY_DESMOPLASIC_VS_CLASSIC_MD_DN | Genes expressed in classic medulloblastomas. (p < 0.01)                                                                                                                                                                                                    | 1.614 | 0.010 | 1.000      |
| 2                                                                             | MYC_TARGETS                          | Myc-responsive genes reported in multiple systems                                                                                                                                                                                                          | 1.602 | 0.014 | 0.987      |
| 3                                                                             | TSA_CD4_UP                           | Up-regulated in mouse CD4+ T-cells following 4 hour treatment with 100 nM trichostatin A                                                                                                                                                                   | 1.446 | 0.085 | 1.000      |
| 4                                                                             | MENSSEN_MYC_UP                       | Genes up-regulated by MYC in HUVEC (umbilical vein endothelial cell)                                                                                                                                                                                       | 1.442 | 0.106 | 1.000      |
| 5                                                                             | ROTH_HTERT_DIFF                      | Expression of selected genes involved in DNA repair and cell-cycle control in hTERT-transduced T cells                                                                                                                                                     | 1.437 | 0.070 | 1.000      |
| 6                                                                             | UVB_NHEK4_24HRS_DN                   | Downregulated at 24 hours by UV-B light in normal human epidermal keratinocytes                                                                                                                                                                            | 1.417 | 0.095 | 1.000      |
| 7                                                                             | GENOTOXINS_4HRS_DISCR                | Group of genes whose regulation pattern significantly discriminates between direct (cisplatin, methyl methanesulfonate, mitomycin C) and indirect (taxol, hydroxyurea, etoposide) genotoxins, 4 hours following treatment of mouse lymphocytes (TK 3.7.2C) | 1.410 | 0.035 | 1.000      |
| 8                                                                             | FLECHNER_KIDNEY_TRANSPLANT_WELL_DN   | Genes downregulated in well functioning transplanted kidney biopsies from stable, immunosuppressed recipients relative to normal healthy donor kidney biopsies (median FDR < 0.16% per comparison).                                                        | 1.406 | 0.090 | 1.000      |
| 9                                                                             | 4NQO_UNIQUE_FIBRO_UP                 | Up-regulated at any timepoint by treatment of human fibroblasts with 4-nitroquinoline-1-oxide (4NQO), but not by UV or gamma radiation                                                                                                                     | 1.393 | 0.060 | 1.000      |
| 10                                                                            | ABRAHAM_AL_VS_MM_DN                  | Genes with significantly lower average gene expression in AL plasma cells than in MM cells                                                                                                                                                                 | 1.370 | 0.095 | 1.000      |
| 11                                                                            | BRCA_BRCA1_POS                       | Genes whose expression is consistently positively correlated with brca1 germline status in breast cancer - higher expression is associated with sporadic tumors                                                                                            | 1.363 | 0.067 | 1.000      |
| 12                                                                            | COLLER_MYC_UP                        | Genes up-regulated by MYC in 293T (transformed fetal renal cell).                                                                                                                                                                                          | 1.351 | 0.134 | 1.000      |
| 13                                                                            | ABRAHAM_MM_VS_AL_UP                  | Genes highly expressed in multiple myeloma (MM) versus immunoglobulin light chain amyloidosis (AL) in plasma cells.                                                                                                                                        | 1.343 | 0.113 | 1.000      |
| 14                                                                            | MOREAUX_TACI_HI_IN_BMPC              | BMPC genes overexpressed in TACI high patients                                                                                                                                                                                                             | 1.342 | 0.100 | 1.000      |
| 15                                                                            | HDACI_COLON_CUR24HRS_UP              | Upregulated by curcumin at 24 hrs in SW260 colon carcinoma cells                                                                                                                                                                                           | 1.325 | 0.148 | 1.000      |
| 16                                                                            | HDACI_COLON_CUR2HRS_UP               | Upregulated by curcumin at 2 hrs in SW260 colon carcinoma cells                                                                                                                                                                                            | 1.320 | 0.121 | 1.000      |
| 17                                                                            | ET743_RESIST_DN                      | Down-regulated in two Et-743-resistant cell lines (chondrosarcoma and ovarian carcinoma) compared to sensitive parental lines                                                                                                                              | 1.297 | 0.132 | 1.000      |
| 18                                                                            | HIPPOCAMPUS_DEVELOPMENT_PRENATAL     | Highly expressed in prenatal mouse hippocampus (cluster 1)                                                                                                                                                                                                 | 1.268 | 0.202 | 1.000      |
| 19                                                                            | HOFMANN_MDS_CD34_LOW_RISK            | Genes differentially expressed in CD34 cells from patients with low-risk MDS compared with healthy controls                                                                                                                                                | 1.264 | 0.156 | 1.000      |
| 20                                                                            | UV-4NQO_FIBRO_UP                     | Up-regulated at any timepoint by treatment of human fibroblasts with UV light or 4-NQO, but not by gamma radiation                                                                                                                                         | 1.248 | 0.190 | 1.000      |
