# Supplementary material
Source: PubMed Central journal article supplement (PMC4874239)
Supplement: supp_JCO.2009.27.4324_SupplementaryTable5d-CGP-GroupD-CGP-Table-Formatted.pdf [file supp_JCO.2009.27.4324_SupplementaryTable5d-CGP-GroupD-CGP-Table-Formatted.pdf]

Northcott et al. Supplementary Table 5d

| GSEA: Chemical & Genetic Perturbations --- Enriched in Group D vs Non-Group D |                                             |                                                                                                                                                                                                    |              |              |              |
|-------------------------------------------------------------------------------|---------------------------------------------|----------------------------------------------------------------------------------------------------------------------------------------------------------------------------------------------------|--------------|--------------|--------------|
| Rank                                                                          | Gene Set Name                               | Description                                                                                                                                                                                        | NES          | pVal         | FDR qValue   |
| 1                                                                             | HOFMANN_MDS_CD34_HIGH_RISK                  | Genes differentially expressed in CD34 cells from patients with high-risk MDS compared with healthy controls                                                                                       | 1.736        | 0.006        | 0.186        |
| <b>2</b>                                                                      | <b>AGUIRRE_PANCREAS_CHR17</b>               | <b>Genes on chromosome 17 with copy-number-driven expression in pancreatic adenocarcinoma.</b>                                                                                                     | <b>1.734</b> | <b>0.010</b> | <b>0.095</b> |
| 3                                                                             | BRENTANI_DNA_METHYLATION_AND_MODIFICATION   | Cancer related genes involved in DNA methylation and modification                                                                                                                                  | 1.679        | 0.006        | 0.153        |
| 4                                                                             | SHIPP_DLBCL_CURED_UP                        | Genes upregulated in cured diffuse B-cell lymphoma (DLBCL) and downregulated in fatal/refractory diffuse B-cell lymphomas (DLBCL) (fold change ? 3)                                                | 1.646        | 0.012        | 0.179        |
| 5                                                                             | HEARTFAILURE_ATRIA_UP                       | Upregulated in atria of failing hearts (DCM and ICM) compared to healthy controls                                                                                                                  | 1.630        | 0.020        | 0.183        |
| 6                                                                             | MARSHALL_SPLEEN_BAL                         | Genes downregulated in influenza-specific CD8+ T cells isolated from spleen as compared to those from bronchoalveolar lavage (BAL) during influenza pneumonia in mice.                             | 1.442        | 0.047        | 1.000        |
| 7                                                                             | GH_EXOGENOUS_LATE_UP                        | Up-regulated at late time points (12-24 hours) following treatment of mammary carcinoma cells (MCF-7) with exogenous human growth hormone                                                          | 1.438        | 0.042        | 0.979        |
| 8                                                                             | HINATA_NFKB_DN                              | Genes downregulated by NF-kappa B                                                                                                                                                                  | 1.398        | 0.100        | 1.000        |
| 9                                                                             | CMV_HCMV_TIMECOURSE_18HRS_UP                | Up-regulated in fibroblasts following infection with human cytomegalovirus (at least 3-fold, with Affymetrix change call, in at least two consecutive timepoints), with maximum change at 18 hours | 1.394        | 0.098        | 1.000        |
| 10                                                                            | CANCERDRUGS_PROBCELL_UP                     | Up-regulated by at least two of four cancer drugs (cisplatin, camptothecin, methotrexate and/or paclitaxel) in pro-B cells (FL5.12)                                                                | 1.389        | 0.097        | 0.986        |
| 11                                                                            | MAGRANGEAS_MULTIPLE_MYELOMA_A_IGL_VS_IGK_DN | Genes downregulated in multiple myeloma plasma cells that secrete the light chain immunoglobulin Ig-lambda versus those that secrete Ig-kappa.                                                     | 1.380        | 0.095        | 0.951        |
| 12                                                                            | AGED_MOUSE_HIPPOCAMPUS_MU_LTI_UP            | Up-regulated in the hippocampus of 16-month aged mice from at least two of four strains (S8, S10, SR1, B6J), versus 3-month young controls                                                         | 1.361        | 0.089        | 0.997        |
| 13                                                                            | WONG_IFNA_HCC_RESISTANT_VS_SENSITIVE_UP     | Genes highly expressed in interferon-resistant hepatoma cell lines (HKCl-C1-3) vs. sensitive cell lines (HKCl-1-4, HepG2, Hep3B, PCL/PRF/5)                                                        | 1.355        | 0.102        | 0.955        |
| 14                                                                            | COCAINE_BRAIN_5D_UP                         | Up-regulated in the nucleus accumbens of mice after 5 days of cocaine treatment                                                                                                                    | 1.351        | 0.083        | 0.908        |
| 15                                                                            | HUMAN_TISSUE_THYMUS                         | Genes expressed specifically in human thymus tissue                                                                                                                                                | 1.340        | 0.131        | 0.906        |
| 16                                                                            | AGED_MOUSE_HIPPOCAMPUS_ANY_DN               | Down-regulated in the hippocampus of 16-month aged mice from any of four strains (S8, S10, SR1, B6J), versus 3-month young controls                                                                | 1.335        | 0.100        | 0.877        |
| 17                                                                            | DFOSB_BRAIN_8WKS_UP                         | Up-regulated in the nucleus accumbens of mice after 8 weeks of induction of transgenic deltaFosB                                                                                                   | 1.324        | 0.105        | 0.879        |
| 18                                                                            | WANG_HOXA9_VS_MEIS1_UP                      | Genomic signature of progenitors immortalized by Hoxa9 versus Hoxa9 plus Meis1 Increased expression in Hoxa9-immortalized progenitors                                                              | 1.313        | 0.132        | 0.887        |
| 19                                                                            | GH_EXOGENOUS_ANY_DN                         | Down-regulated at any time point (1-24 hours) following treatment of mammary carcinoma cells (MCF-7) with exogenous human growth hormone                                                           | 1.312        | 0.072        | 0.844        |
| 20                                                                            | DAC_IFN_BLADDER_UP                          | Interferon-regulated genes upregulated by DAC treatment in T24 bladder carcinoma cells                                                                                                             | 1.311        | 0.176        | 0.809        |
