# Supplementary material
Source: PubMed Central journal article supplement (PMC4874239)
Supplement: supp_JCO.2009.27.4324_SupplementaryTable5e-CGP-GroupC-D-CGP-Table-Formatted.pdf [file supp_JCO.2009.27.4324_SupplementaryTable5e-CGP-GroupC-D-CGP-Table-Formatted.pdf]

Northcott et al. Supplementary Table 5e

| GSEA: Chemical & Genetic Perturbations --- Enriched in Group C vs Group D     |                                           |                                                                                                                                                                                                                                               |        |       |            |
|-------------------------------------------------------------------------------|-------------------------------------------|-----------------------------------------------------------------------------------------------------------------------------------------------------------------------------------------------------------------------------------------------|--------|-------|------------|
| #                                                                             | Gene Set Name                             | Description                                                                                                                                                                                                                                   | NES    | pVal  | FDR qValue |
| 1                                                                             | IDX_TSA_UP_CLUSTER4                       | Progressively up-regulated from 8-48 hours during differentiation of 3T3-L1 fibroblasts into adipocytes with IDX (insulin, dexamethasone and isobutylxanthine), vs. fibroblasts treated with IDX + TSA to prevent differentiation (cluster 4) | 1.787  | 0.002 | 0.297      |
| 2                                                                             | 5FU_RESIST_GASTRIC_DN                     | Downregulated in gastric cancer cell lines resistant to 5-fluorouracil, compared to parent chemosensitive lines                                                                                                                               | 1.755  | 0.000 | 0.253      |
| 3                                                                             | TSA_CD4_UP                                | Up-regulated in mouse CD4+ T-cells following 4 hour treatment with 100 nM trichostatin A                                                                                                                                                      | 1.730  | 0.006 | 0.250      |
| 4                                                                             | POMEROY_MD_TREATMENT_GOOD_VS_POOR_DN      | Genes highly associated with medulloblastoma treatment failure                                                                                                                                                                                | 1.701  | 0.002 | 0.291      |
| 5                                                                             | TPA_SENS_EARLY_UP                         | Upregulated by TPA at two consecutive timepoints between 15min-3hrs in sensitive HL-60 cell                                                                                                                                                   | 1.654  | 0.008 | 0.458      |
| 6                                                                             | PENG_LEUCINE_DN                           | Genes downregulated in response to leucine starvation                                                                                                                                                                                         | 1.633  | 0.012 | 0.516      |
| 7                                                                             | AGUIRRE_PANCREAS_CHR19                    | Genes on chromosome 19 with copy-number-driven expression in pancreatic adenocarcinoma.                                                                                                                                                       | 1.622  | 0.067 | 0.513      |
| 8                                                                             | MYOD_BRG1_UP                              | Genes up-regulated following transduction of MyoD in NIH 3T3 cells that fail to achieve full induction with expression of a dominant-negative BRG1 allele; induction thought to require functional BRG1                                       | 1.607  | 0.019 | 0.539      |
| 9                                                                             | COLLER_MYC_UP                             | Genes up-regulated by MYC in 293T (transformed fetal renal cell).                                                                                                                                                                             | 1.603  | 0.032 | 0.503      |
| 10                                                                            | MYC_ONCOGENIC_SIGNATURE                   | Genes selected in supervised analyses to discriminate cells expressing c-Myc oncogene from control cells expressing GFP.                                                                                                                      | 1.592  | 0.025 | 0.511      |
| GSEA: Chemical & Genetic Perturbations --- Impoverished in Group C vs Group D |                                           |                                                                                                                                                                                                                                               |        |       |            |
| #                                                                             | Name                                      | Description                                                                                                                                                                                                                                   | NES    | pVal  | FDR qValue |
| 1                                                                             | HOFMANN_MDS_CD34_HIGH_RISK                | Genes differentially expressed in CD34 cells from patients with high-risk MDS compared with healthy controls                                                                                                                                  | -1.783 | 0.000 | 0.189      |
| 2                                                                             | BRENTANI_DNA_METHYLATION_AND_MODIFICATION | Cancer related genes involved in DNA methylation and modification                                                                                                                                                                             | -1.668 | 0.012 | 0.604      |
| 3                                                                             | AGED_MOUSE_HIPPOCAMPUS_MULTI_UP           | Up-regulated in the hippocampus of 16-month aged mice from at least two of four strains (S8, S10, SR1, B6J), versus 3-month young controls                                                                                                    | -1.575 | 0.008 | 1.000      |
| 4                                                                             | INSULIN_ADIP_INSENS_DN                    | Down-regulated by insulin in murine adipocytes, and continue to respond following induction of insulin-resistance with TNFalpha treatment                                                                                                     | -1.574 | 0.042 | 0.994      |
| 5                                                                             | NI2_MOUSE_DN                              | Downregulated by nickel(II) in sensitive A/J mouse lung tissue                                                                                                                                                                                | -1.564 | 0.014 | 0.884      |
| 6                                                                             | HUMAN_TISSUE_PLACENTA                     | Genes expressed specifically in human placental tissue                                                                                                                                                                                        | -1.552 | 0.043 | 0.833      |
| 7                                                                             | UV-4NQO_FIBRO_DN                          | Down-regulated at any timepoint by treatment of human fibroblasts with UV light or 4-NQO, but not by gamma radiation                                                                                                                          | -1.540 | 0.034 | 0.807      |
| 8                                                                             | GH_EXOGENOUS_LATE_UP                      | Up-regulated at late time points (12-24 hours) following treatment of mammary carcinoma cells (MCF-7) with exogenous human growth hormone                                                                                                     | -1.515 | 0.040 | 0.899      |
| 9                                                                             | COCAINE_BRAIN_5D_UP                       | Up-regulated in the nucleus accumbens of mice after 5 days of cocaine treatment                                                                                                                                                               | -1.488 | 0.024 | 1.000      |
| 10                                                                            | POMEROY_MD_TREATMENT_GOOD_VS_POOR_UP      | Genes highly associated with favorable response to treatment for medulloblastoma                                                                                                                                                              | -1.478 | 0.061 | 1.000      |
