# Supplementary material
Source: PubMed Central journal article supplement (PMC4874239)
Supplement: supp_JCO.2009.27.4324_SupplementaryTable6-Nov30-09-flat.pdf [file supp_JCO.2009.27.4324_SupplementaryTable6-Nov30-09-flat.pdf]

**A**

|                | Hazard ratio | .95 lower CI | .95 upper CI | logrank p-value |
|----------------|--------------|--------------|--------------|-----------------|
| age18          | 1.05         | 0.51         | 2.167        | 0.900           |
| Gender         | 1.33         | 0.85         | 2.064        | 0.209           |
| Mstage.dM1     | 0.93         | 0.44         | 1.948        | 0.828           |
| Mstage.dM2     | 1.18         | 0.47         | 2.937        | 0.726           |
| Mstage.dM3     | 2.23         | 1.32         | 3.772        | 0.002           |
| Resection      | 0.78         | 0.52         | 1.180        | 0.238           |
| Histology.dDMB | 0.82         | 0.30         | 2.242        | 0.686           |
| Histology.dLGA | 4.92         | 2.89         | 8.375        | <0.001          |
| WNT            | 0.52         | 0.26         | 1.042        | 0.061           |
| SHH            | 0.57         | 0.34         | 0.956        | 0.031           |
| C              | 3.97         | 2.55         | 6.194        | <0.001          |
| D              | 0.81         | 0.50         | 1.328        | 0.406           |

**Univariate prognostic value - PFS**

**B**

|              | coef   | exp(coef) | se(coef) | z      | p     |
|--------------|--------|-----------|----------|--------|-------|
| age18>18     | 0.284  | 1.328     | 0.383    | 0.740  | 0.459 |
| GenderM      | 0.319  | 1.375     | 0.227    | 1.402  | 0.161 |
| Resection1   | -0.064 | 0.938     | 0.222    | -0.287 | 0.774 |
| HistologyDMB | -0.160 | 0.852     | 0.524    | -0.305 | 0.761 |
| HistologyLGA | 1.492  | 4.448     | 0.297    | 5.028  | 0.000 |
| MstageM1     | -0.082 | 0.921     | 0.382    | -0.215 | 0.830 |
| MstageM2     | -0.124 | 0.883     | 0.479    | -0.259 | 0.795 |
| MstageM3     | 0.500  | 1.649     | 0.291    | 1.718  | 0.086 |

**Clinical multivariate Cox PH model for PFS**

**C**

|              | coef   | exp(coef) | se(coef) | z      | p     |
|--------------|--------|-----------|----------|--------|-------|
| age18>18     | 0.731  | 2.078     | 0.446    | 1.639  | 0.101 |
| GenderM      | 0.226  | 1.254     | 0.238    | 0.952  | 0.341 |
| Resection1   | -0.044 | 0.957     | 0.229    | -0.191 | 0.848 |
| HistologyDMB | 0.270  | 1.311     | 0.538    | 0.503  | 0.615 |
| HistologyLGA | 1.330  | 3.780     | 0.299    | 4.453  | 0.000 |
| MstageM1     | -0.296 | 0.744     | 0.409    | -0.723 | 0.469 |
| MstageM2     | -0.250 | 0.779     | 0.481    | -0.519 | 0.604 |
| MstageM3     | 0.262  | 1.299     | 0.295    | 0.886  | 0.376 |
| SHH1         | -0.072 | 0.930     | 0.485    | -0.149 | 0.882 |
| WNT1         | -0.477 | 0.621     | 0.646    | -0.738 | 0.460 |
| C1           | 1.362  | 3.904     | 0.504    | 2.704  | 0.007 |
| D1           | 0.270  | 1.310     | 0.488    | 0.553  | 0.580 |

**clinical/molecular multivariate Cox PH model for PFS**
