# Supplementary material
Source: PubMed Central journal article supplement (PMC4874239)
Supplement: supp_JCO.2009.27.4324_SupplementaryTable7-Nov30-09-flat.pdf [file supp_JCO.2009.27.4324_SupplementaryTable7-Nov30-09-flat.pdf]

**A**

|                | Hazard ratio | .95 lower CI | .95 upper CI | logrank p-value |
|----------------|--------------|--------------|--------------|-----------------|
| age18          | 0.66         | 0.241        | 1.817        | 0.419           |
| Gender         | 1.17         | 0.709        | 1.936        | 0.537           |
| Mstage.dM1     | 0.80         | 0.316        | 2.019        | 0.614           |
| Mstage.dM2     | 1.21         | 0.434        | 3.374        | 0.739           |
| Mstage.dM3     | 2.49         | 1.394        | 4.442        | 0.002           |
| Resection      | 0.78         | 0.481        | 1.256        | 0.297           |
| Histology.dDMB | 0.58         | 0.140        | 2.374        | 0.434           |
| Histology.dLGA | 6.74         | 3.840        | 11.817       | <0.001          |
| WNT            | 0.14         | 0.035        | 0.579        | 0.002           |
| SHH            | 0.42         | 0.219        | 0.798        | 0.006           |
| C              | 6.74         | 4.040        | 11.231       | <0.001          |
| D              | 0.72         | 0.408        | 1.257        | 0.238           |

**Univariate prognostic value - OS**

**B**

|              | coef   | exp(coef) | se(coef) | z      | p     |
|--------------|--------|-----------|----------|--------|-------|
| age18>18     | -0.121 | 0.886     | 0.529    | -0.228 | 0.820 |
| GenderM      | 0.150  | 1.162     | 0.261    | 0.576  | 0.565 |
| Resection1   | -0.045 | 0.956     | 0.254    | -0.177 | 0.860 |
| HistologyDMB | -0.548 | 0.578     | 0.730    | -0.751 | 0.453 |
| HistologyLGA | 1.783  | 5.949     | 0.314    | 5.675  | 0.000 |
| MstageM1     | -0.314 | 0.731     | 0.478    | -0.657 | 0.511 |
| MstageM2     | -0.205 | 0.815     | 0.541    | -0.379 | 0.705 |
| MstageM3     | 0.420  | 1.522     | 0.324    | 1.296  | 0.195 |

**Clinical multivariate Cox PH model for OS**

**C**

|              | coef   | exp(coef) | se(coef) | z      | p     |
|--------------|--------|-----------|----------|--------|-------|
| age18>18     | 0.770  | 2.160     | 0.584    | 1.319  | 0.187 |
| GenderM      | -0.077 | 0.926     | 0.269    | -0.285 | 0.776 |
| Resection1   | 0.089  | 1.094     | 0.264    | 0.338  | 0.735 |
| HistologyDMB | 0.107  | 1.112     | 0.746    | 0.143  | 0.886 |
| HistologyLGA | 1.660  | 5.260     | 0.316    | 5.252  | 0.000 |
| MstageM1     | -0.500 | 0.606     | 0.485    | -1.031 | 0.303 |
| MstageM2     | -0.349 | 0.705     | 0.542    | -0.645 | 0.519 |
| MstageM3     | 0.165  | 1.179     | 0.322    | 0.512  | 0.609 |
| SHH1         | -0.182 | 0.834     | 0.569    | -0.319 | 0.749 |
| WNT1         | -1.756 | 0.173     | 1.141    | -1.540 | 0.124 |
| C1           | 1.852  | 6.371     | 0.587    | 3.152  | 0.002 |
| D1           | 0.391  | 1.479     | 0.570    | 0.687  | 0.492 |

**Clinical/molecular multivariate Cox PH model for OS**
