# Supplementary material
Source: PubMed Central journal article supplement (PMC4874239)

A

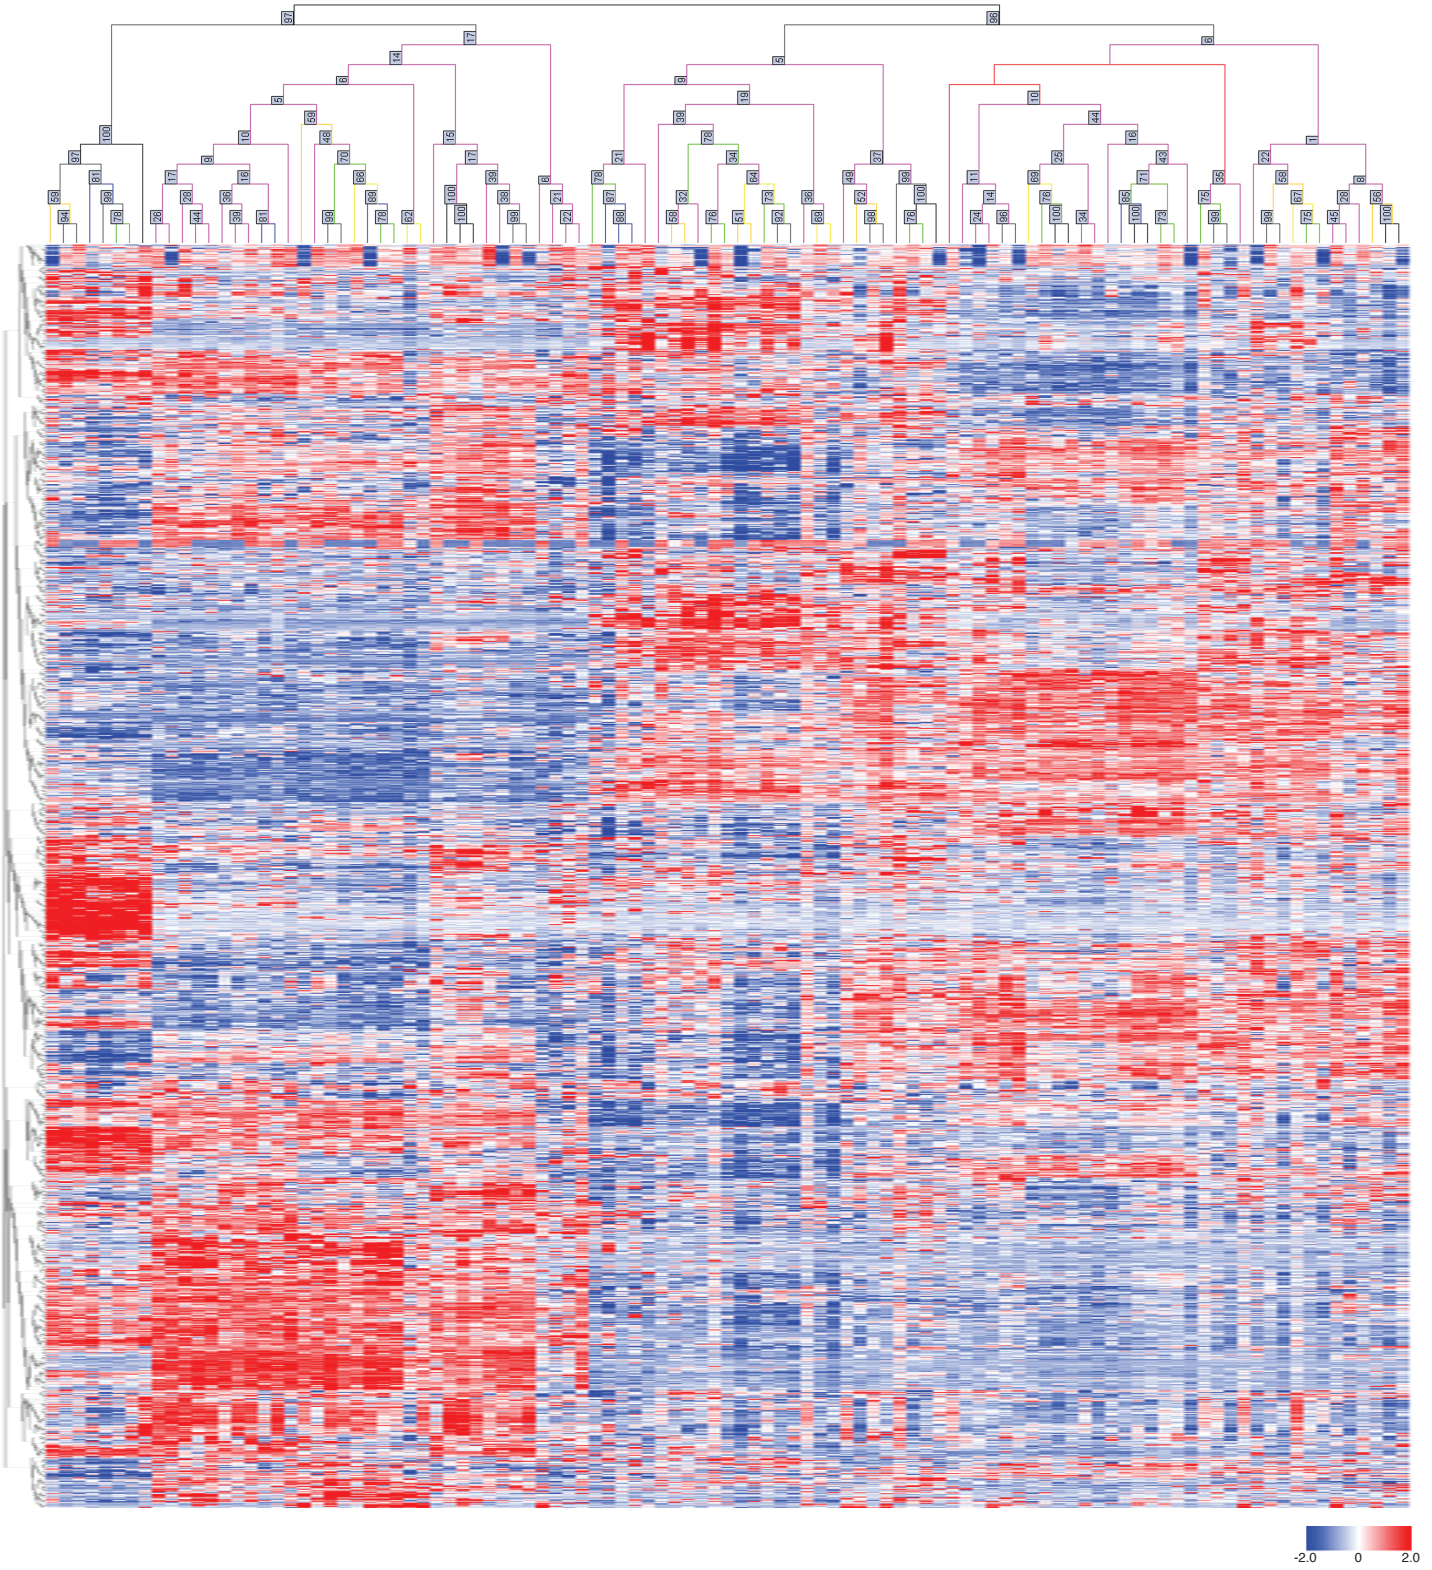

Supplement: supp_JCO.2009.27.4324_SupplementaryFigure-1a-MB103-ST.pdf [file supp_JCO.2009.27.4324_SupplementaryFigure-1a-MB103-ST.pdf]

Northcott et al. Supplementary Figure 1.

B

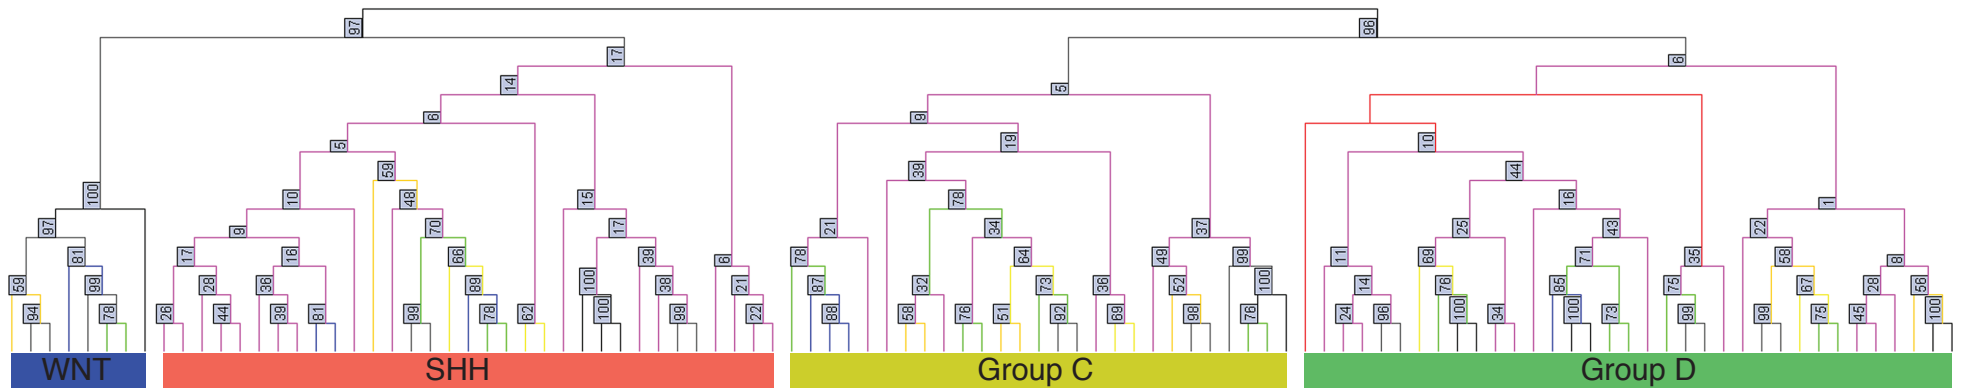

Supplement: supp_JCO.2009.27.4324_SupplementaryFigure-1b-SupportTrees-July22-09.pdf [file supp_JCO.2009.27.4324_SupplementaryFigure-1b-SupportTrees-July22-09.pdf]

# Northcott et al. Supplementary Figure 1.

## C

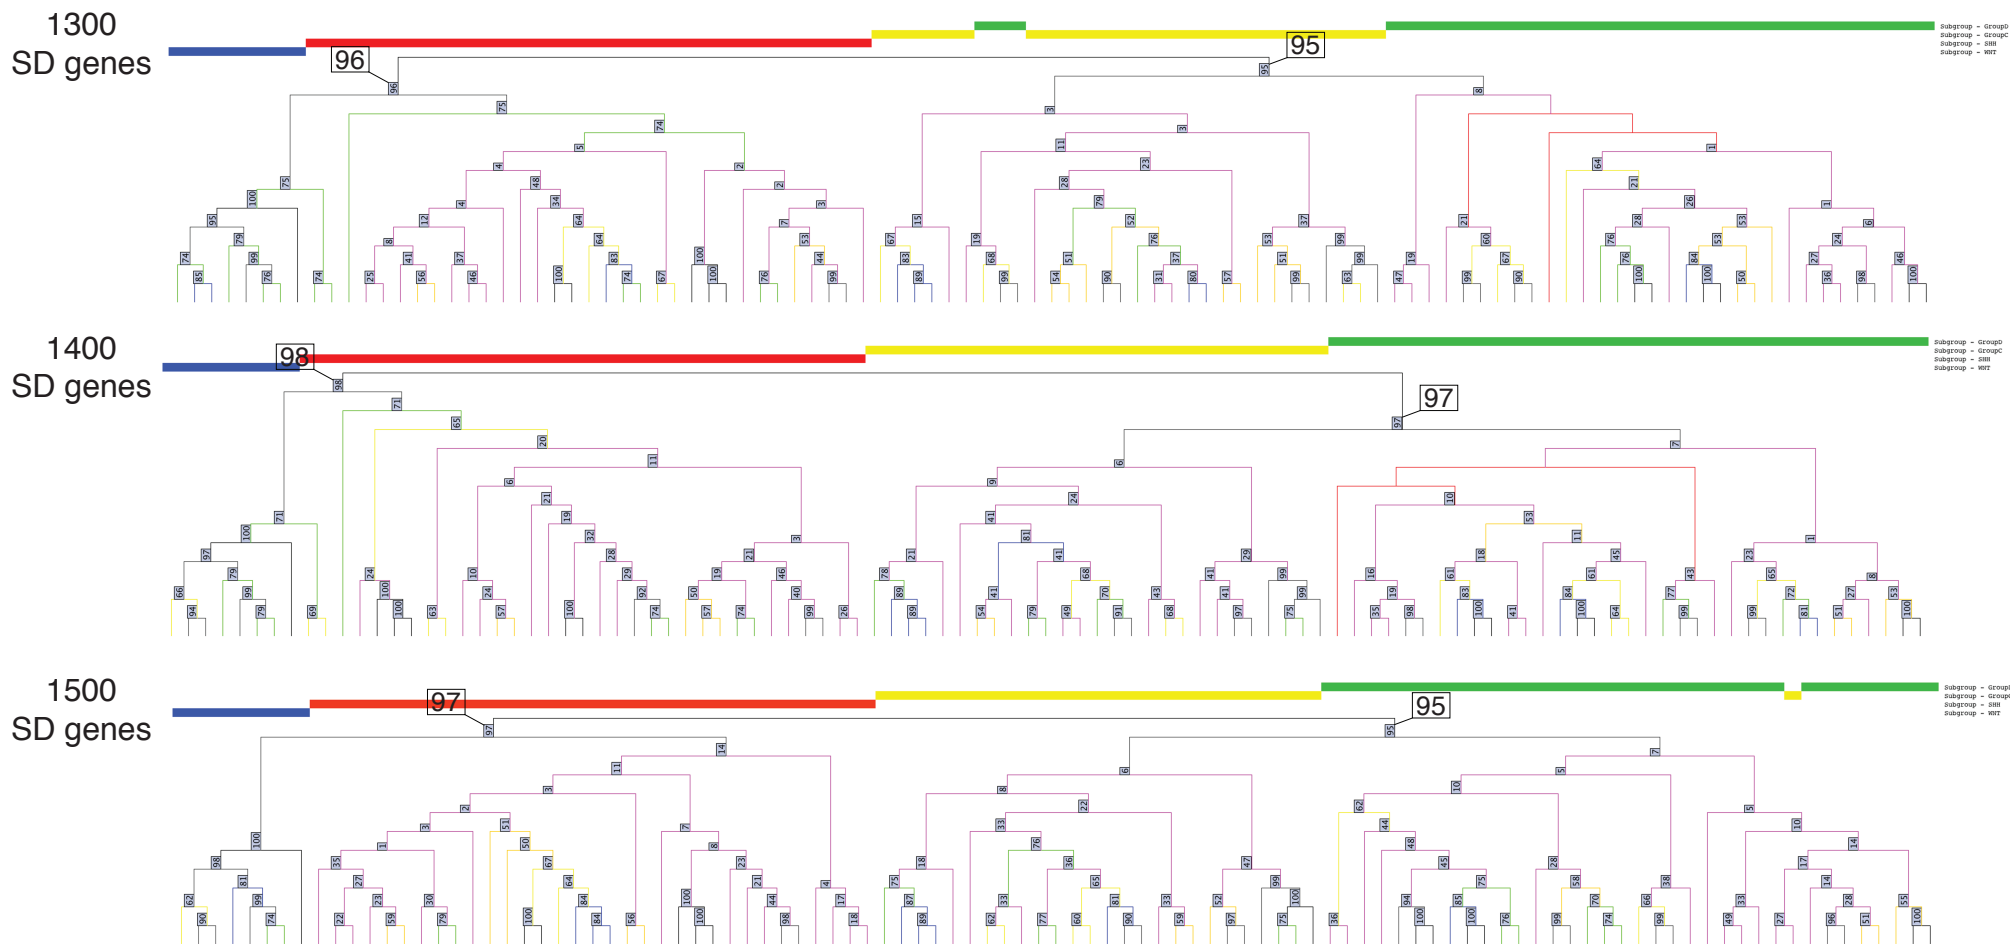

Supplement: supp_JCO.2009.27.4324_SupplementaryFigure-1c-MB103-ST.pdf [file supp_JCO.2009.27.4324_SupplementaryFigure-1c-MB103-ST.pdf]

# Northcott et al. Supplementary Figure 1.

## D

2000  
SD genes

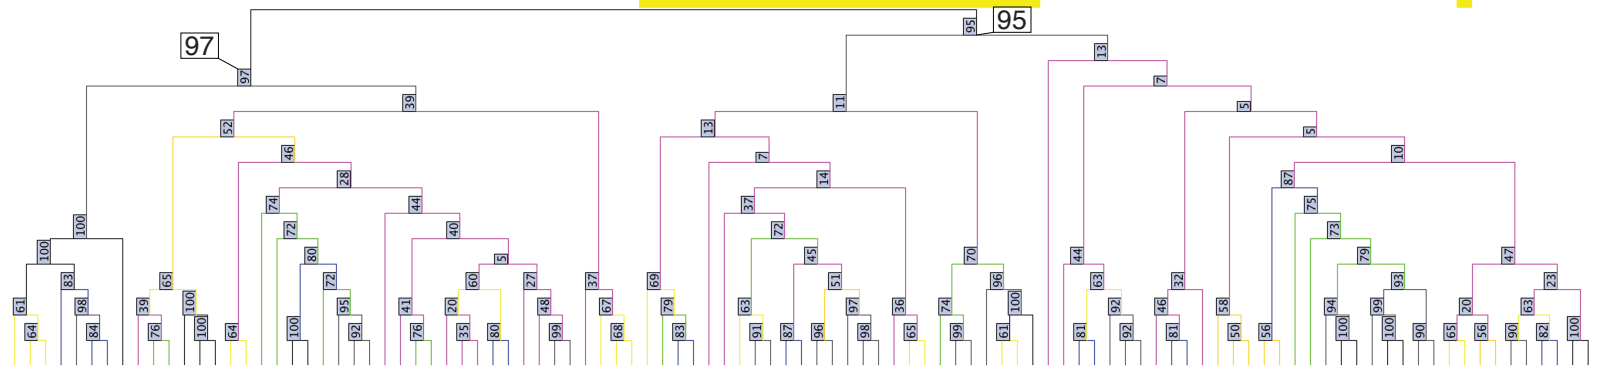

3000  
SD genes

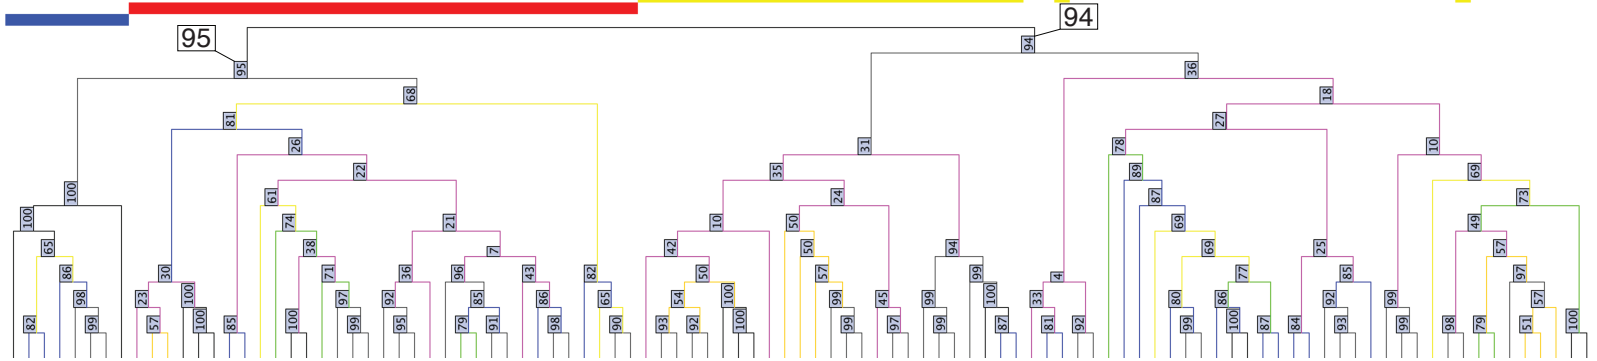

4000  
SD genes

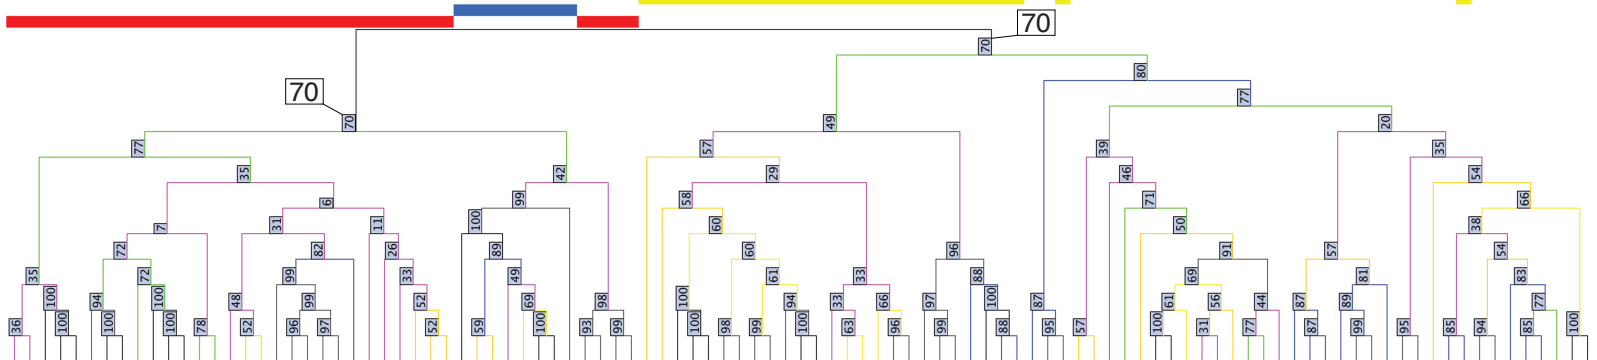

Supplement: supp_JCO.2009.27.4324_SupplementaryFigure-1d-Jan28-10.pdf [file supp_JCO.2009.27.4324_SupplementaryFigure-1d-Jan28-10.pdf]

Northcott et al. Supplementary Figure 3.

A

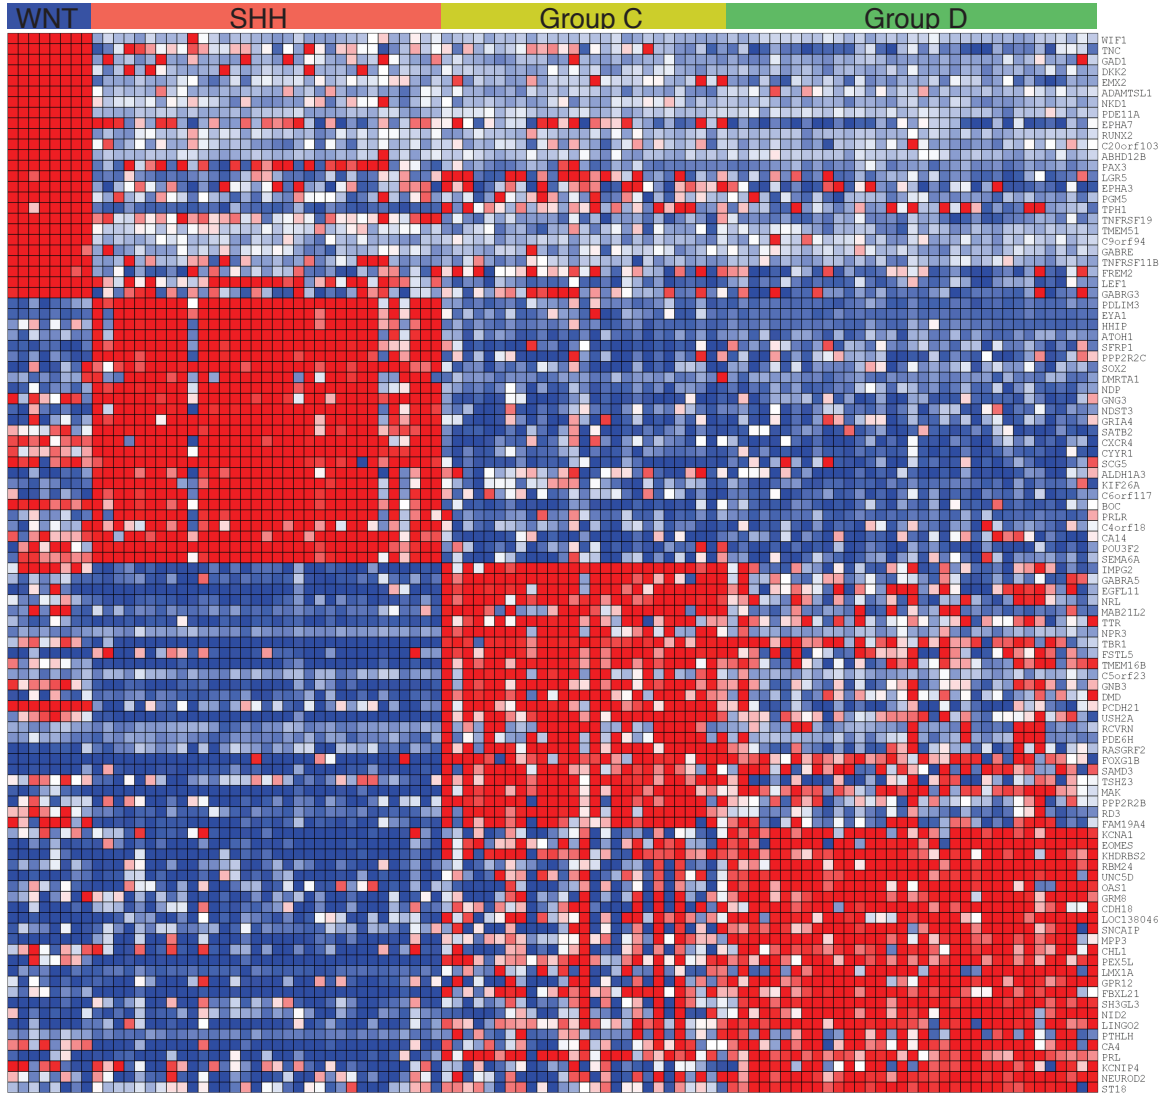

B

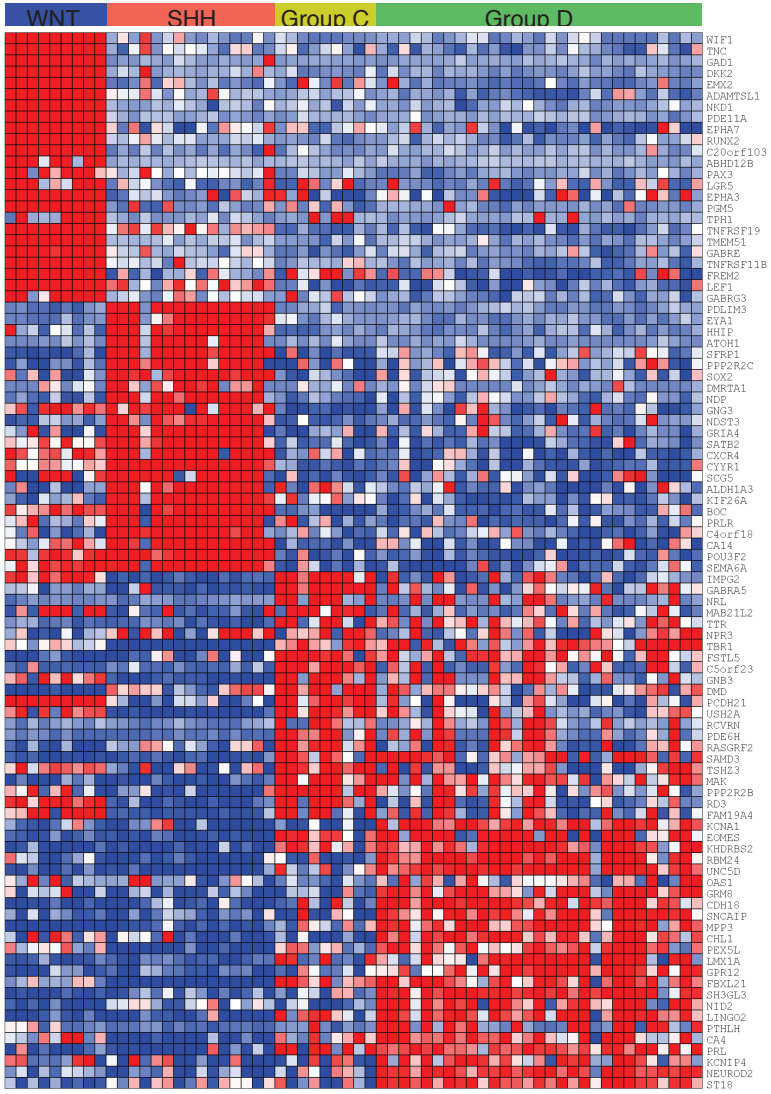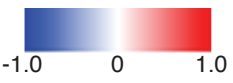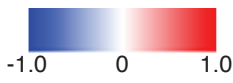

Supplement: supp_JCO.2009.27.4324_SupplementaryFigure-3AB-Former2A-April7-10.pdf [file supp_JCO.2009.27.4324_SupplementaryFigure-3AB-Former2A-April7-10.pdf]

Northcott et al. Supplementary Figure 4.

A

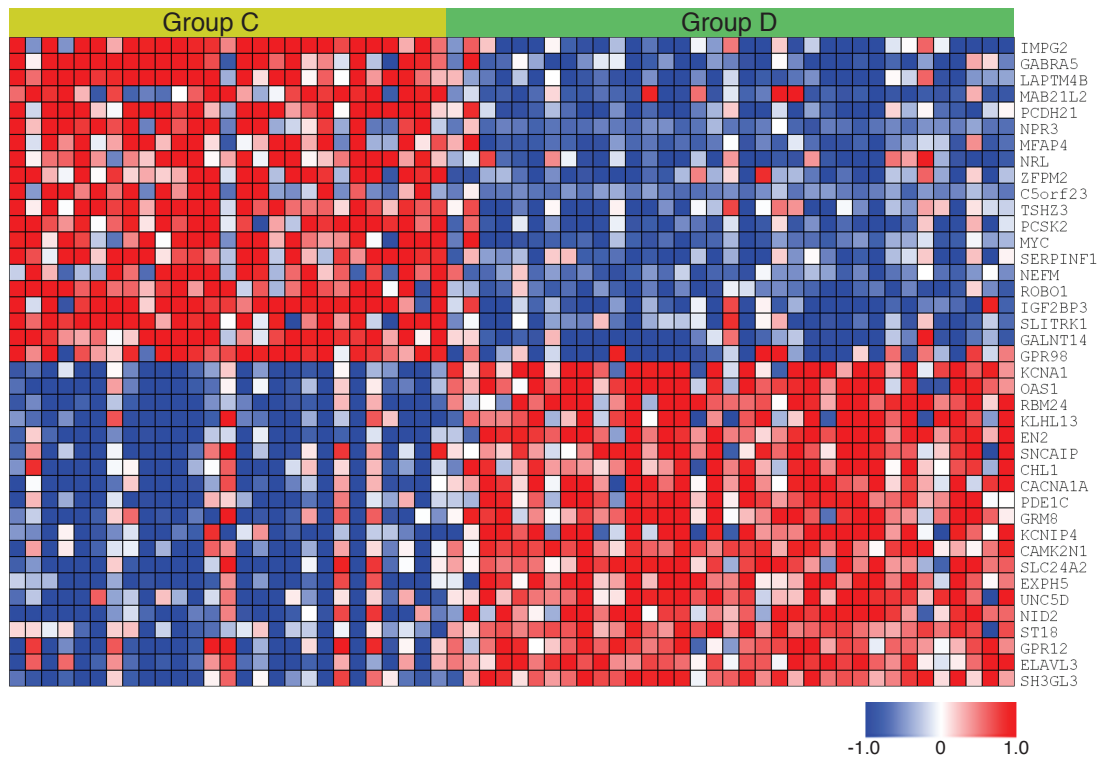

B

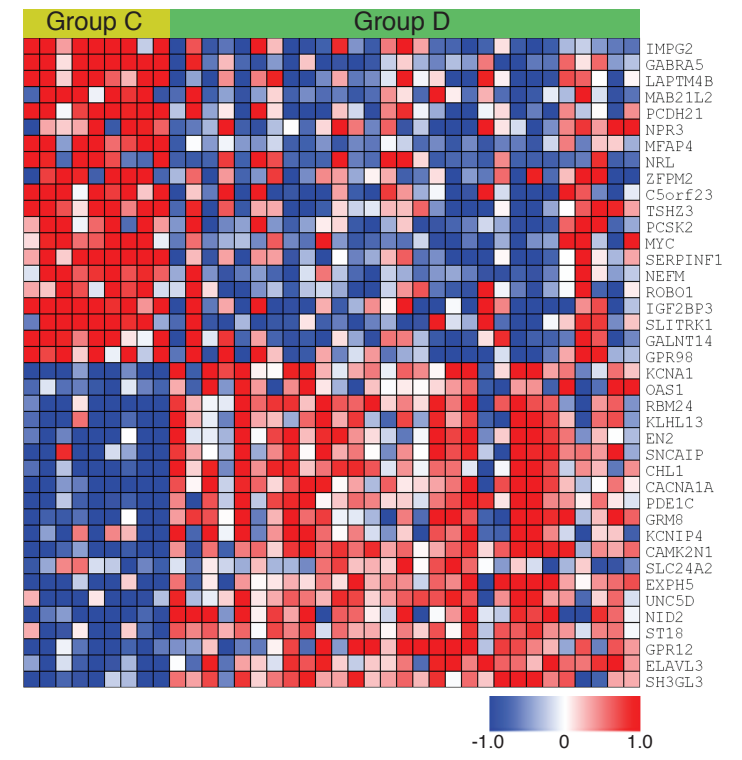

Supplement: supp_JCO.2009.27.4324_SupplementaryFigure-4AB-Former2B-April7-10.pdf [file supp_JCO.2009.27.4324_SupplementaryFigure-4AB-Former2B-April7-10.pdf]

# Northcott et al. Supplementary Figure 5.

## A

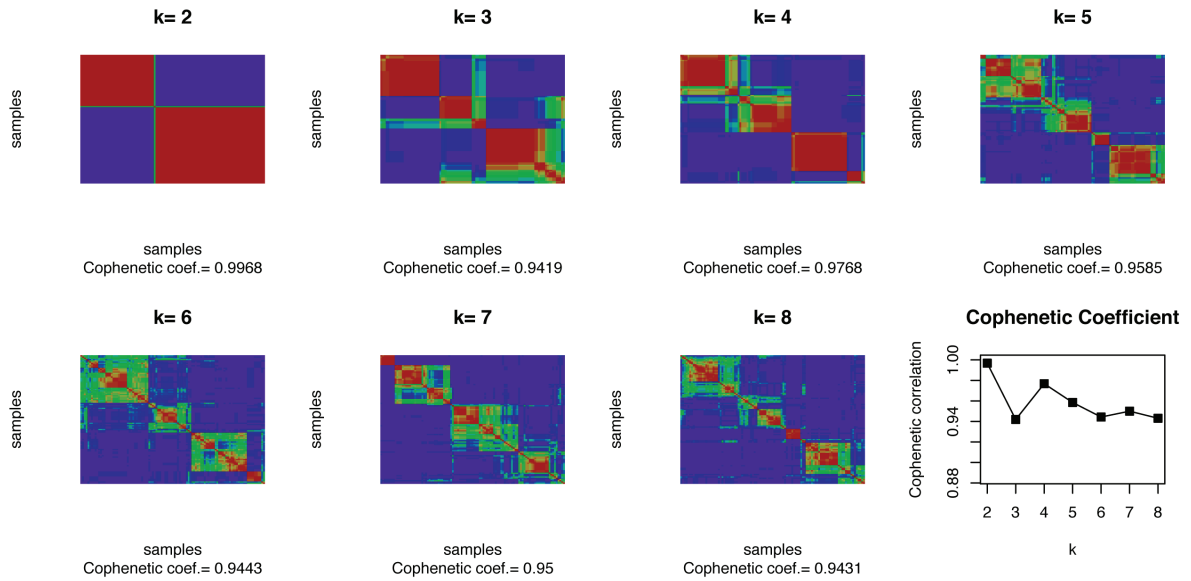

## B

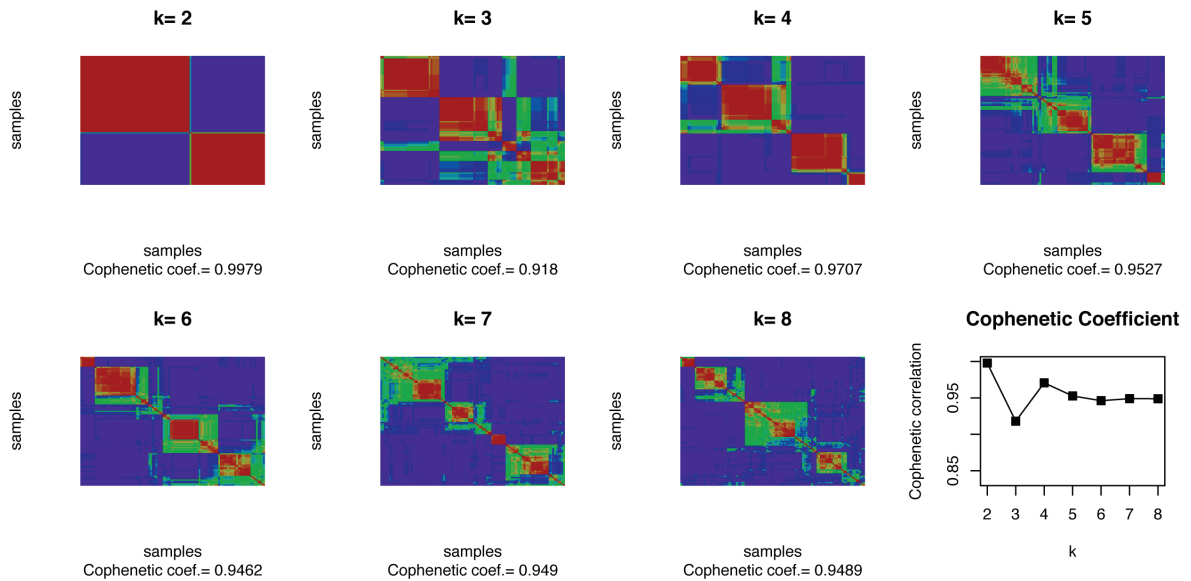

## C

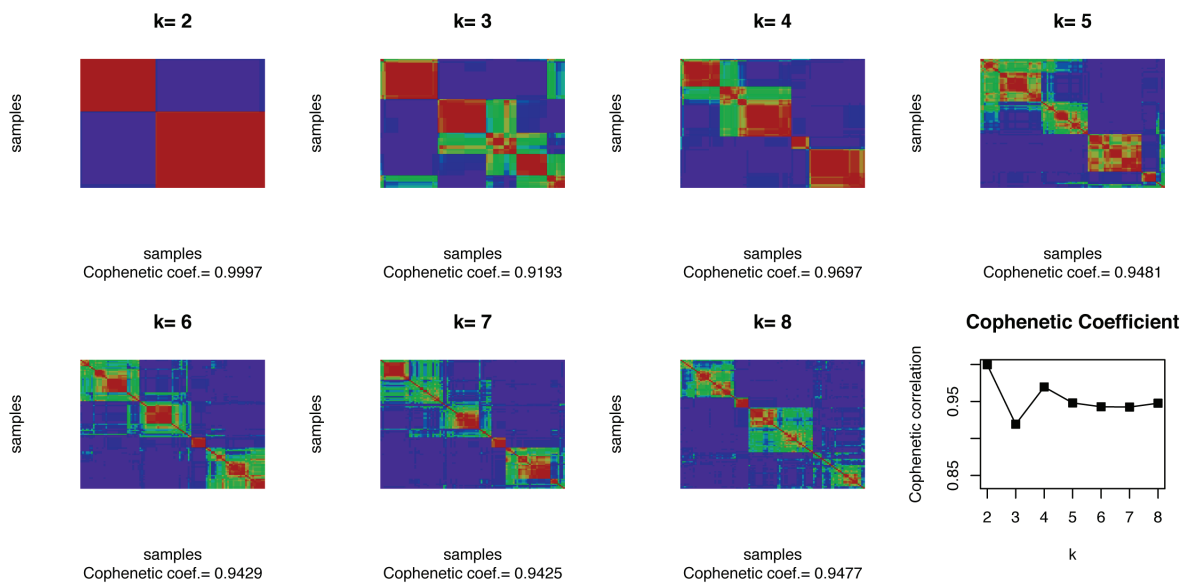

Supplement: supp_JCO.2009.27.4324_SupplementaryFigure-5-NMF-Nov25-09.pdf [file supp_JCO.2009.27.4324_SupplementaryFigure-5-NMF-Nov25-09.pdf]

# Northcott et al. Supplementary Figure 6.

## WNT

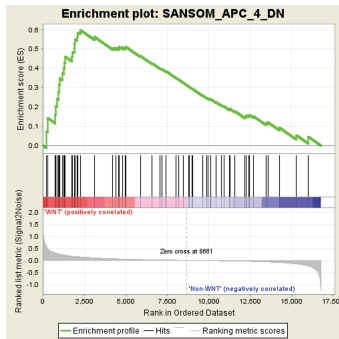

## SHH

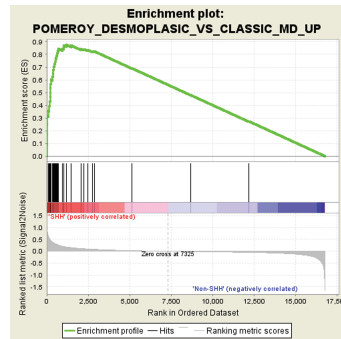

## Group C

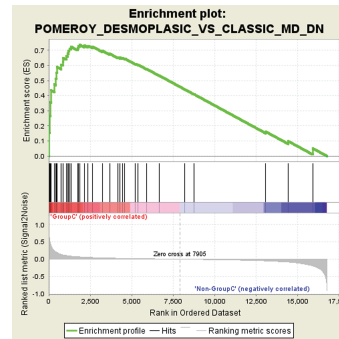

## Group D

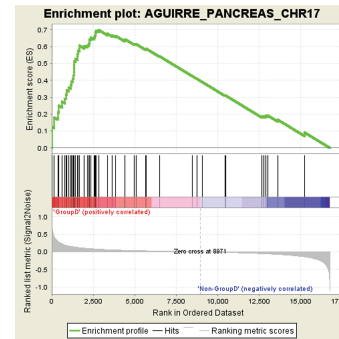

## Group C vs D

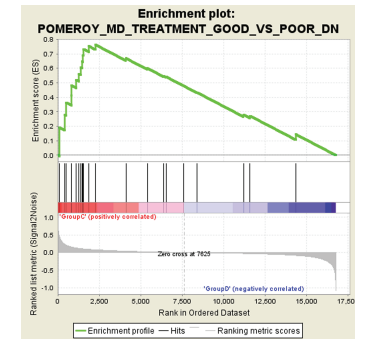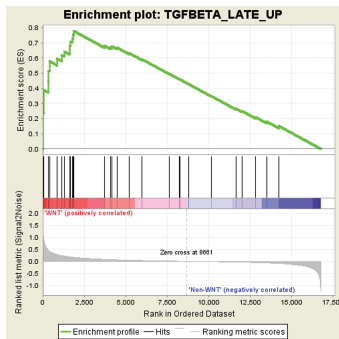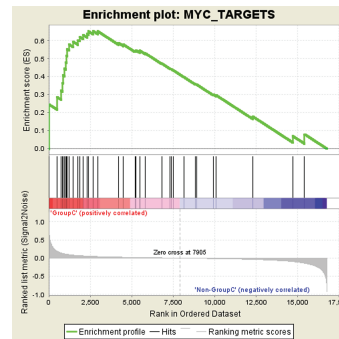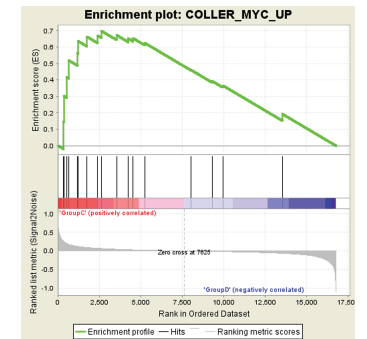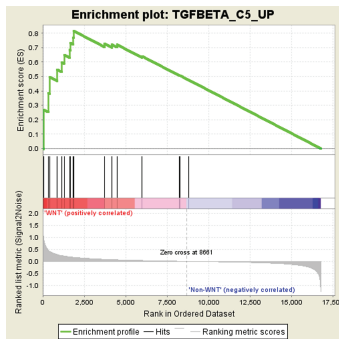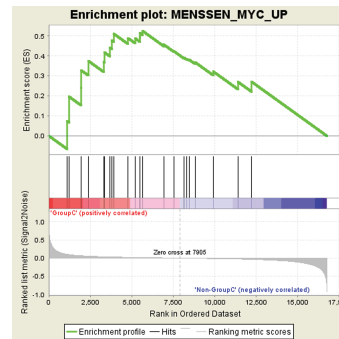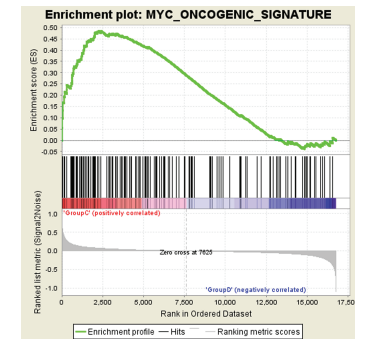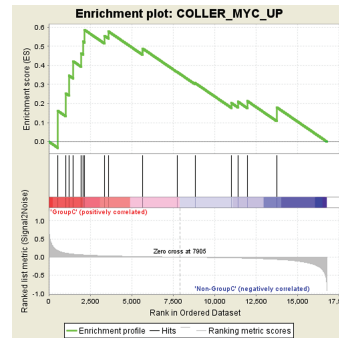

Supplement: supp_JCO.2009.27.4324_SupplementaryFigure-6-GSEA-Enrichment-CGP.pdf [file supp_JCO.2009.27.4324_SupplementaryFigure-6-GSEA-Enrichment-CGP.pdf]

# Northcott et al. Supplementary Figure 7.

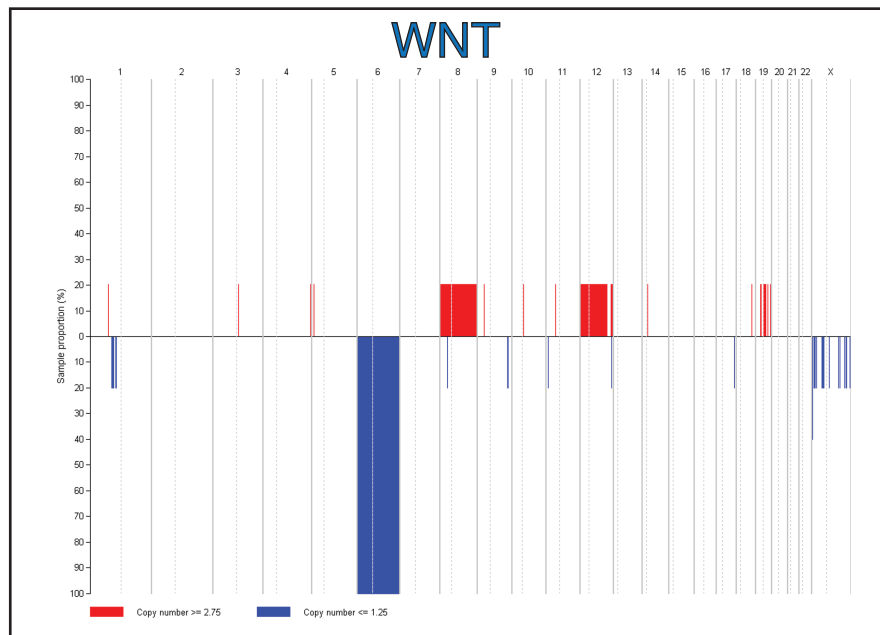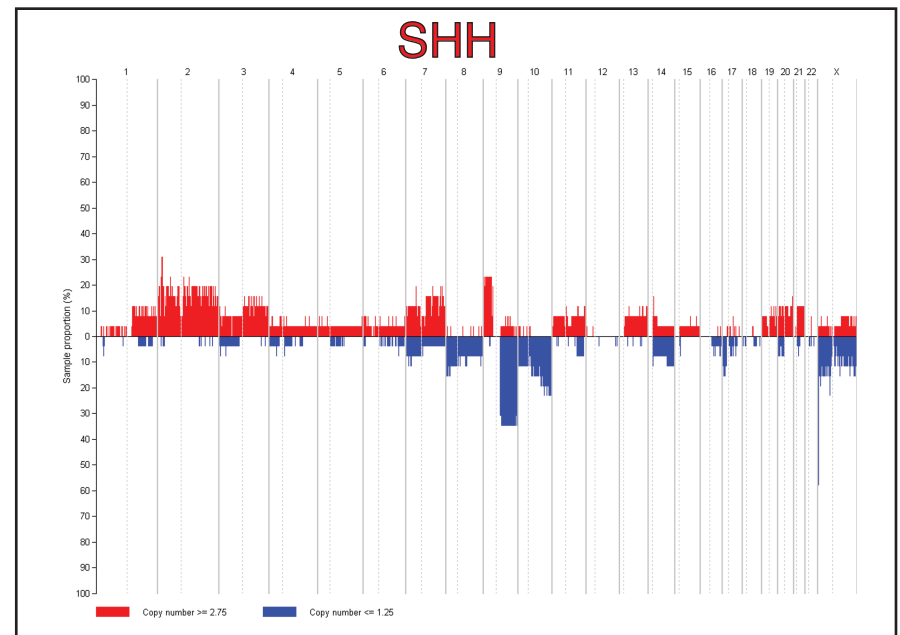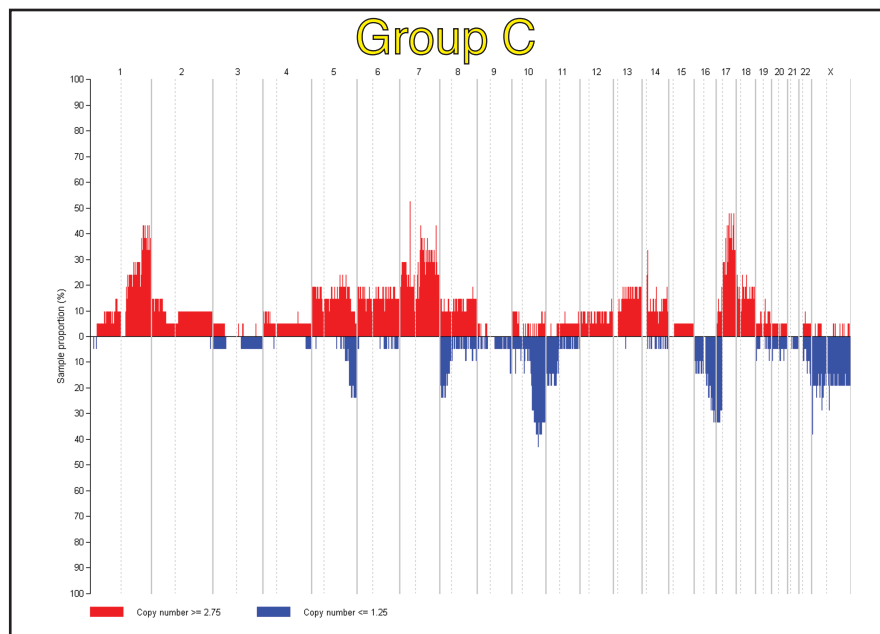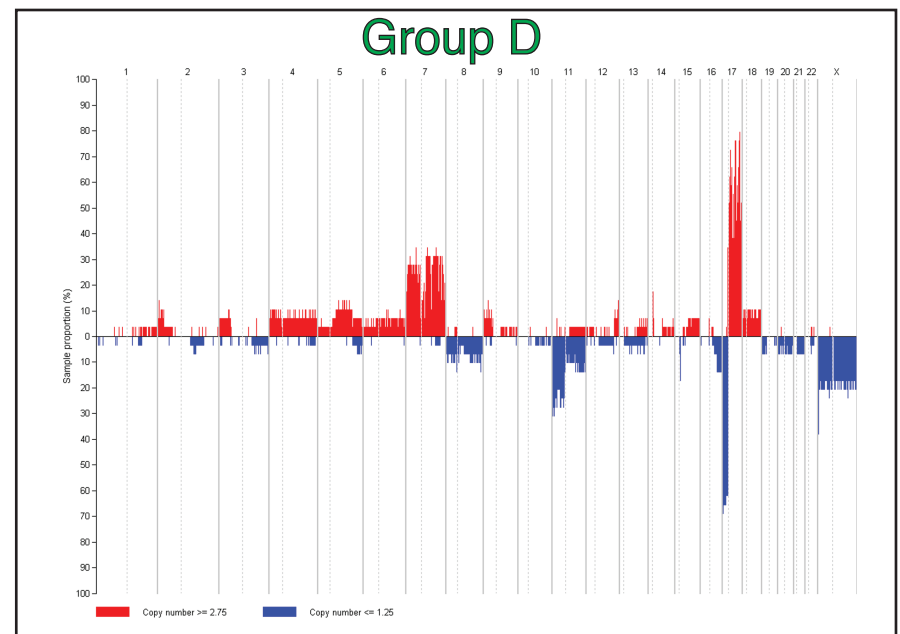

Supplement: supp_JCO.2009.27.4324_SupplementaryFigure-7-SummaryPlots.pdf [file supp_JCO.2009.27.4324_SupplementaryFigure-7-SummaryPlots.pdf]

# Northcott et al. Supplementary Figure 8.

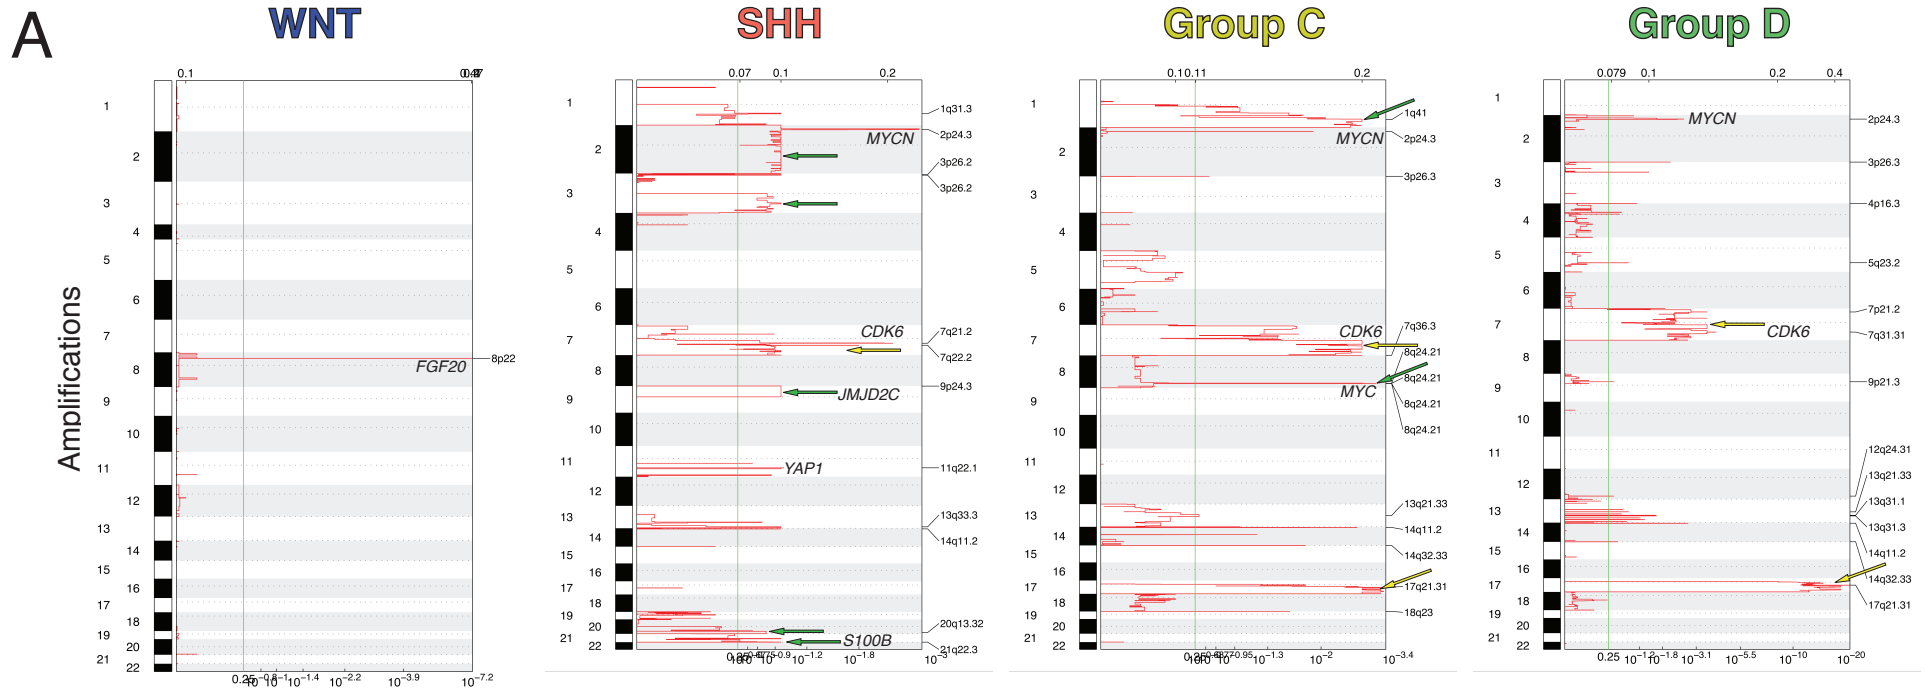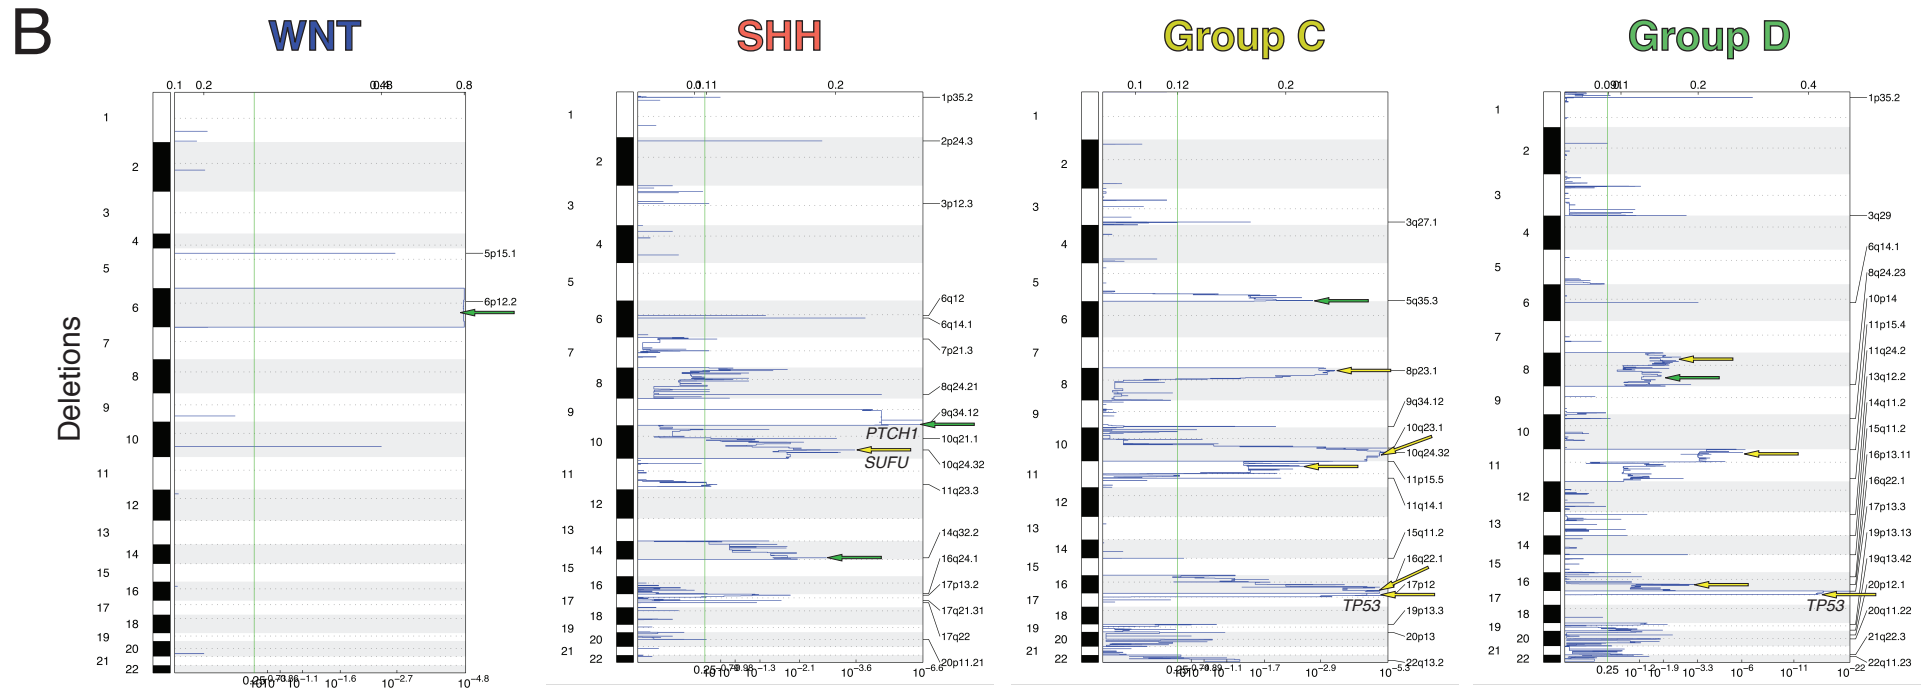

Supplement: supp_JCO.2009.27.4324_SupplementaryFigure-8AB-Former3CD-April7-10.pdf [file supp_JCO.2009.27.4324_SupplementaryFigure-8AB-Former3CD-April7-10.pdf]
